# Supplementary material for: Molecular modeling provides a structural basis for PERK inhibitor selectivity towards RIPK1
Source: Royal Society of Chemistry journal article supplement (doi:10.1039/c9ra08047c), 2020-01-01
Supplement: c9ra08047c1.pdf [file c9ra08047c1.pdf]

## Molecular modeling provides structural basis for PERK inhibitor selectivity towards RIPK1

Chetan Chintha<sup>1#</sup>, Antonio Carlesso<sup>2#</sup>, Adrienne M. Gorman<sup>1</sup>, Afshin Samali<sup>1</sup>, Leif A. Eriksson<sup>2\*</sup>

<sup>1</sup>Apoptosis Research Centre, National University of Ireland Galway, Galway, Ireland.

<sup>2</sup>Department of Chemistry and Molecular Biology, University of Gothenburg, 405 30 Göteborg, Sweden

#These authors contributed equally to this work.

### \*Correspondence

Leif Eriksson, Department of Chemistry and Molecular Biology,  
University of Gothenburg, 405 30 Göteborg, Sweden.

Email: leif.eriksson@chem.gu.se

## SUPPLEMENTARY INFORMATION

|                                                                                                                                                                                                                                                                                                                                                                                                                               | Page          |
|-------------------------------------------------------------------------------------------------------------------------------------------------------------------------------------------------------------------------------------------------------------------------------------------------------------------------------------------------------------------------------------------------------------------------------|---------------|
| <b>Table S1.</b> List of proteins with binding site similar to RIPK1 as calculated by the ProBiS server <sup>[1]</sup>                                                                                                                                                                                                                                                                                                        | <b>S2-S11</b> |
| <b>Table S2:</b> Calculated docking and binding affinity (MMGBSA) scores of compounds for RIPK1 (PDB 4NEU) active site using different strategies. (A) The Glide SP docked poses. (B) Induced fit docking (IFD) poses. (C) Protein-ligand frames at every 10ns from the 100ns MD simulation was used for MMGBSA calculation, SD stands for standard deviation and N/A for not applicable, where no valid poses were obtained. | <b>S12</b>    |
| <b>Figure S1.</b> Per amino-acid interaction energy map for PERK co-crystal structures: crystal structure of GSK6414 Bound (PDB code: 4G31), crystal structure of GSK6157 bound (PDB code: 4M7I) and co-crystal structure of PERK bound to AMG44 (PDB code: 4X7N). (A) Electrostatic energy values (kcal/mol). (B) Hydrophobic score (arbitrary units).                                                                       | <b>S13</b>    |
| <b>Figure S2.</b> Active site dynamics of the RIPK1 complexes during 100ns MD simulations. RMSD of the active site residues is plotted as a function of MD simulation time.                                                                                                                                                                                                                                                   | <b>S13</b>    |
| <b>Figure S3.</b> Comparison of the number of hydrogen bonds (H-bonds) formed by the compounds at the RIPK1 active site during the 100 ns MD simulation.                                                                                                                                                                                                                                                                      | <b>S14</b>    |
| <b>Bibliography</b>                                                                                                                                                                                                                                                                                                                                                                                                           | <b>S14</b>    |

**Table S1.** List of proteins with binding site similar to RIPK1 as calculated by the ProBiS sever<sup>[1]</sup>

| PDB  | Protein Name                                                        | UniProt ID | Z-Score |
|------|---------------------------------------------------------------------|------------|---------|
| 4neu | RECEPTOR-INTERACTING SERINE/THREONINE-PROTEIN KINASE 1              | Q13546     | 5.3     |
| 4itj | RECEPTOR-INTERACTING SERINE/THREONINE-PROTEIN KINASE 1              | Q13546     | 4.7     |
| 4c8b | RECEPTOR-INTERACTING SERINE/THREONINE-PROTEIN KINASE 2              | O43353     | 4.1     |
| 3dtc | MITOGEN-ACTIVATED PROTEIN KINASE KINASE KINASE 9                    | P80192     | 3.9     |
| 3soc | ACTIVIN RECEPTOR TYPE-2A                                            | P27037     | 3.9     |
| 3u4w | PROTO-ONCOGENE TYROSINE-PROTEIN KINASE SRC                          | P00523     | 3.9     |
| 4csv | SRC-ABL TYROSINE KINASE ANCESTOR                                    | N/A        | 3.9     |
| 4x2j | TGF-BETA RECEPTOR TYPE-1                                            | P36897     | 3.9     |
| 4hcu | TYROSINE-PROTEIN KINASE ITK/TSK                                     | Q08881     | 3.9     |
| 2eva | TAK1 KINASE - TAB1 CHIMERA FUSION PROTEIN                           | O43318     | 3.8     |
| 5c9c | SERINE/THREONINE-PROTEIN KINASE B-RAF                               | P15056     | 3.8     |
| 1qpc | LCK KINASE                                                          | P06239     | 3.8     |
| 4kik | INHIBITOR OF NUCLEAR FACTOR KAPPA-B KINASE SUBUNIT BETA             | O14920     | 3.8     |
| 3pls | MACROPHAGE-STIMULATING PROTEIN RECEPTOR                             | Q04912     | 3.8     |
| 1byg | PROTEIN (C-TERMINAL SRC KINASE)                                     | P41240     | 3.8     |
| 3zfx | EPHRIN TYPE-B RECEPTOR 1                                            | P54762     | 3.8     |
| 2xik | SERINE/THREONINE PROTEIN KINASE 25                                  | O00506     | 3.8     |
| 4cqe | SLC45A3-BRAF FUSION PROTEIN                                         | D7PBN4     | 3.8     |
| 3q4u | ACTIVIN RECEPTOR TYPE-1                                             | Q04771     | 3.8     |
| 1p4o | INSULIN-LIKE GROWTH FACTOR I RECEPTOR PROTEIN                       | P08069     | 3.8     |
| 3hng | VASCULAR ENDOTHELIAL GROWTH FACTOR RECEPTOR 1                       | P17948     | 3.8     |
| 4y5q | CALMODULIN-DOMAIN PROTEIN KINASE 1, PUTATIVE                        | A3FQ16     | 3.7     |
| 4pdp | SERINE/THREONINE-PROTEIN KINASE RAD53                               | P22216     | 3.7     |
| 4xi2 | TYROSINE-PROTEIN KINASE BTK                                         | P35991     | 3.7     |
| 4x7k | EUKARYOTIC TRANSLATION INITIATION FACTOR 2-ALPHA KINASE 3           | Q9NZJ5     | 3.7     |
| 4yzn | PROBABLE SERINE/THREONINE-PROTEIN KINASE ROCO4                      | Q6XHB2     | 3.7     |
| 4ymj | NT-3 GROWTH FACTOR RECEPTOR                                         | Q16288     | 3.7     |
| 3lzb | EPIDERMAL GROWTH FACTOR RECEPTOR                                    | P00533     | 3.7     |
| 4clj | ALK TYROSINE KINASE RECEPTOR                                        | Q9UM73     | 3.7     |
| 3zbf | PROTO-ONCOGENE TYROSINE-PROTEIN KINASE ROS                          | P08922     | 3.7     |
| 2psq | FIBROBLAST GROWTH FACTOR RECEPTOR 2                                 | P21802     | 3.7     |
| 4m66 | RECEPTOR-INTERACTING SERINE/THREONINE-PROTEIN KINASE 3              | Q9QZL0     | 3.7     |
| 3vhe | VASCULAR ENDOTHELIAL GROWTH FACTOR RECEPTOR 2                       | P35968     | 3.7     |
| 3p86 | SERINE/THREONINE-PROTEIN KINASE CTR1                                | Q05609     | 3.7     |
| 2r0i | SERINE/THREONINE-PROTEIN KINASE MARK2                               | O08679     | 3.7     |
| 1jpa | NEURAL KINASE, NUK=EPH/ELK/ECK FAMILY RECEPTOR-LIKE TYROSINE KINASE | P54763     | 3.7     |

|      |                                                                            |            |     |
|------|----------------------------------------------------------------------------|------------|-----|
| 2vd5 | DMPK PROTEIN                                                               | Q09013     | 3.7 |
| 1t46 | HOMO SAPIENS V-KIT HARDY-ZUCKERMAN 4 FELINE SARCOMA VIRAL ONCOGENE HOMOLOG | P10721     | 3.7 |
| 3vo3 | VASCULAR ENDOTHELIAL GROWTH FACTOR RECEPTOR 2                              | P35968     | 3.7 |
| 3is5 | CALCIUM-DEPENDENT PROTEIN KINASE                                           | N/A        | 3.7 |
| 4qqt | FIBROBLAST GROWTH FACTOR RECEPTOR 4                                        | P22455     | 3.7 |
| 2hk5 | TYROSINE-PROTEIN KINASE HCK                                                | P08631     | 3.7 |
| 2qkw | PROTEIN KINASE                                                             | Q40234     | 3.7 |
| 3hmi | TYROSINE-PROTEIN KINASE ABL2                                               | P42684     | 3.7 |
| 3s95 | LIM DOMAIN KINASE 1                                                        | P53667     | 3.7 |
| 1blx | CYCLIN-DEPENDENT KINASE 6                                                  | Q00534     | 3.7 |
| 4ase | VASCULAR ENDOTHELIAL GROWTH FACTOR RECEPTOR 2                              | P35968     | 3.7 |
| 1opk | PROTO-ONCOGENE TYROSINE-PROTEIN KINASE ABL1                                | P00520     | 3.7 |
| 4aaa | CYCLIN-DEPENDENT KINASE-LIKE 2                                             | Q92772     | 3.7 |
| 3lxp | NON-RECEPTOR TYROSINE-PROTEIN KINASE TYK2                                  | P29597     | 3.7 |
| 2z7r | RIBOSOMAL PROTEIN S6 KINASE ALPHA-1                                        | Q15418     | 3.6 |
| 2h8h | PROTO-ONCOGENE TYROSINE-PROTEIN KINASE SRC                                 | P12931     | 3.6 |
| 1phk | PHOSPHORYLASE KINASE                                                       | P00518     | 3.6 |
| 4rt7 | RECEPTOR-TYPE TYROSINE-PROTEIN KINASE FLT3                                 | P36888     | 3.6 |
| 3omv | RAF PROTO-ONCOGENE SERINE/THREONINE-PROTEIN KINASE                         | P04049     | 3.6 |
| 1k9a | CARBOXYL-TERMINAL SRC KINASE                                               | P32577     | 3.6 |
| 1rjb | FL CYTOKINE RECEPTOR                                                       | P36888     | 3.6 |
| 4pl3 | SERINE/THREONINE-PROTEIN KINASE/ENDORIBONUCLEASE IRE1                      | Q9EQY0     | 3.6 |
| 4gt4 | TYROSINE-PROTEIN KINASE TRANSMEMBRANE RECEPTOR ROR2                        | Q01974     | 3.6 |
| 4y93 | NON-SPECIFIC PROTEIN-TYROSINE KINASE, NON-SPECIFIC PROTEIN-TYROSINE KINASE | Q3ZC95     | 3.6 |
| 1fot | CAMP-DEPENDENT PROTEIN KINASE TYPE 1                                       | P06244     | 3.6 |
| 1qcf | HAEMATOPOETIC CELL KINASE (HCK)                                            | P08631     | 3.6 |
| 3lxl | TYROSINE-PROTEIN KINASE JAK3                                               | P52333     | 3.6 |
| 4usf | STE20-LIKE SERINE/THREONINE-PROTEIN KINASE                                 | Q9H2G2     | 3.6 |
| 2i1m | MACROPHAGE COLONY-STIMULATING FACTOR 1 RECEPTOR                            | P07333     | 3.6 |
| 4oli | NON-RECEPTOR TYROSINE-PROTEIN KINASE TYK2                                  | P29597     | 3.6 |
| 2zv2 | CALCIUM/CALMODULIN-DEPENDENT PROTEIN KINASE KINASE 2                       | Q96RR4     | 3.6 |
| 4crs | SERINE/THREONINE-PROTEIN KINASE N2                                         | Q16513     | 3.6 |
| 4at5 | BDNF/NT-3 GROWTH FACTORS RECEPTOR                                          | Q16620     | 3.6 |
| 3dpk | MACROPHAGE COLONY-STIMULATING FACTOR 1 RECEPTOR                            | P11362     | 3.6 |
| 3bu3 | INSULIN RECEPTOR SUBUNIT BETA                                              | P06213     | 3.5 |
| 4fg8 | CALCIUM/CALMODULIN-DEPENDENT PROTEIN KINASE TYPE 1                         | Q14012     | 3.5 |
| 3ugc | TYROSINE-PROTEIN KINASE JAK2                                               | O60674     | 3.5 |
| 1o6l | RAC-BETA SERINE/THREONINE PROTEIN KINASE                                   | P31751     | 3.5 |
| 4i4e | FOCAL ADHESION KINASE 1                                                    | Q05397     | 3.5 |
| 4rfz | TYROSINE-PROTEIN KINASE BTK                                                | Q06187     | 3.5 |
| 4eqm | PROTEIN KINASE                                                             | A0A0H3JME9 | 3.5 |

|      |                                                                                         |        |     |
|------|-----------------------------------------------------------------------------------------|--------|-----|
| 4pmp | HIGH AFFINITY NERVE GROWTH FACTOR RECEPTOR                                              | P04629 | 3.5 |
| 2wtk | SERINE/THREONINE-PROTEIN KINASE 11                                                      | Q15831 | 3.5 |
| 2vwx | EPHRIN TYPE-B RECEPTOR 4                                                                | P54760 | 3.5 |
| 3b2t | FIBROBLAST GROWTH FACTOR RECEPTOR 2                                                     | P21802 | 3.5 |
| 2i6l | MITOGEN-ACTIVATED PROTEIN KINASE 6                                                      | Q16659 | 3.5 |
| 3kfa | TYROSINE-PROTEIN KINASE ABL1                                                            | P00520 | 3.5 |
| 3zdu | CYCLIN-DEPENDENT KINASE-LIKE 3                                                          | Q81VW4 | 3.5 |
| 4e1z | NON-RECEPTOR TYROSINE-PROTEIN KINASE TYK2                                               | Q9R117 | 3.5 |
| 2r2p | EPHRIN TYPE-A RECEPTOR 5                                                                | P54756 | 3.5 |
| 4xuf | RECEPTOR-TYPE TYROSINE-PROTEIN KINASE FLT3                                              | P36888 | 3.5 |
| 3pfq | PROTEIN KINASE C BETA TYPE                                                              | P68403 | 3.5 |
| 2rei | EPHRIN TYPE-A RECEPTOR 7                                                                | Q15375 | 3.5 |
| 2w4o | CALCIUM/CALMODULIN-DEPENDENT PROTEIN KINASE TYPE IV                                     | Q16566 | 3.5 |
| 4czu | CBL-INTERACTING SERINE/THREONINE-PROTEIN KINASE 23                                      | Q93VD3 | 3.5 |
| 2y6o | EPHRIN TYPE-A RECEPTOR 4                                                                | Q03137 | 3.5 |
| 3mdy | BONE MORPHOGENETIC PROTEIN RECEPTOR TYPE-1B                                             | O00238 | 3.5 |
| 4k33 | FIBROBLAST GROWTH FACTOR RECEPTOR 3                                                     | P22607 | 3.5 |
| 3rp9 | MITOGEN-ACTIVATED PROTEIN KINASE                                                        | B6KP12 | 3.5 |
| 3fme | DUAL SPECIFICITY MITOGEN-ACTIVATED PROTEIN KINASE KINASE 6                              | P52564 | 3.5 |
| 4ct2 | 3-PHOSPHOINOSITIDE-DEPENDENT PROTEIN KINASE 1                                           | O15530 | 3.5 |
| 3g2f | BONE MORPHOGENETIC PROTEIN RECEPTOR TYPE-2                                              | Q13873 | 3.5 |
| 3my0 | SERINE/THREONINE-PROTEIN KINASE RECEPTOR R3                                             | P37023 | 3.5 |
| 3i6u | SERINE/THREONINE-PROTEIN KINASE CHK2                                                    | O96017 | 3.5 |
| 4yhj | G PROTEIN-COUPLED RECEPTOR KINASE 4                                                     | P32298 | 3.5 |
| 4lg4 | SERINE/THREONINE-PROTEIN KINASE 3                                                       | Q13188 | 3.5 |
| 3uiu | INTERFERON-INDUCED, DOUBLE-STRANDED RNA-ACTIVATED PROTEIN KINASE                        | P19525 | 3.4 |
| 4wun | FIBROBLAST GROWTH FACTOR RECEPTOR 1                                                     | P11362 | 3.4 |
| 2dq7 | PROTO-ONCOGENE TYROSINE-PROTEIN KINASE FYN                                              | P06241 | 3.4 |
| 3kmu | INTEGRIN-LINKED KINASE                                                                  | Q13418 | 3.4 |
| 3tt0 | BASIC FIBROBLAST GROWTH FACTOR RECEPTOR 1                                               | P11362 | 3.4 |
| 4tnd | G PROTEIN-COUPLED RECEPTOR KINASE 5                                                     | P34947 | 3.4 |
| 4red | 5'-AMP-ACTIVATED PROTEIN KINASE CATALYTIC SUBUNIT ALPHA-1                               | Q13131 | 3.4 |
| 3brb | PROTO-ONCOGENE TYROSINE-PROTEIN KINASE MER                                              | Q12866 | 3.4 |
| 2bdw | HYPOTHETICAL PROTEIN K11E8.1D                                                           | O62305 | 3.4 |
| 2qol | EPHRIN RECEPTOR                                                                         | P29320 | 3.4 |
| 4jdi | SERINE/THREONINE-PROTEIN KINASE PAK 4                                                   | O96013 | 3.4 |
| 4y0x | SERINE/THREONINE-PROTEIN KINASE PKNG                                                    | P9WI73 | 3.4 |
| 4w9w | BMP-2-INDUCIBLE PROTEIN KINASE                                                          | Q9NSY1 | 3.4 |
| 4aw2 | SERINE/THREONINE-PROTEIN KINASE MRCK ALPHA                                              | O54874 | 3.4 |
| 4ejn | RAC-ALPHA SERINE/THREONINE-PROTEIN KINASE                                               | P31749 | 3.4 |
| 4wb7 | DNAJ HOMOLOG SUBFAMILY B MEMBER 1,CAMP-DEPENDENT PROTEIN KINASE CATALYTIC SUBUNIT ALPHA | P25685 | 3.4 |

|      |                                                                                                 |        |     |
|------|-------------------------------------------------------------------------------------------------|--------|-----|
| 3ork | SERINE/THREONINE PROTEIN KINASE                                                                 | A5TY84 | 3.4 |
| 4fyo | TYROSINE-PROTEIN KINASE SYK                                                                     | P43405 | 3.4 |
| 4xey | TYROSINE-PROTEIN KINASE ABL1                                                                    | P00519 | 3.4 |
| 1mqb | EPHRIN TYPE-A RECEPTOR 2                                                                        | P29317 | 3.4 |
| 2j0j | FOCAL ADHESION KINASE 1                                                                         | Q00944 | 3.4 |
| 3uto | TWITCHIN                                                                                        | Q23551 | 3.4 |
| 3dxn | CALMODULIN-LIKE DOMAIN PROTEIN KINASE ISOFORM 3                                                 | Q3HNM6 | 3.4 |
| 2h6d | 5'-AMP-ACTIVATED PROTEIN KINASE CATALYTIC SUBUNIT ALPHA-2                                       | P54646 | 3.4 |
| 2jc6 | CALCIUM/CALMODULIN-DEPENDENT PROTEIN KINASE TYPE 1D                                             | Q8IU85 | 3.4 |
| 4j8m | AURORA KINASE A                                                                                 | O14965 | 3.4 |
| 3sxs | CYTOPLASMIC TYROSINE-PROTEIN KINASE BMX                                                         | P51813 | 3.4 |
| 3fe3 | MAP/MICROTUBULE AFFINITY-REGULATING KINASE 3                                                    | P27448 | 3.4 |
| 2gcd | SERINE/THREONINE-PROTEIN KINASE TAO2                                                            | Q9JLS3 | 3.4 |
| 1u5r | SERINE/THREONINE PROTEIN KINASE TAO2                                                            | Q9JLS3 | 3.4 |
| 3ggf | SERINE/THREONINE-PROTEIN KINASE MST4                                                            | Q9P289 | 3.4 |
| 4bkj | EPITHELIAL DISCOIDIN DOMAIN-CONTAINING RECEPTOR 1                                               | Q08345 | 3.4 |
| 3lij | CALCIUM/CALMODULIN DEPENDENT PROTEIN KINASE WITH A KINASE DOMAIN AND 4 CALMODULIN LIKE EF HANDS | Q5CS01 | 3.4 |
| 3q5i | PROTEIN KINASE                                                                                  | Q4YRR5 | 3.4 |
| 3c4z | RHODOPSIN KINASE                                                                                | P28327 | 3.4 |
| 3vn9 | DUAL SPECIFICITY MITOGEN-ACTIVATED PROTEIN KINASE KINASE 6                                      | P52564 | 3.4 |
| 4x3f | SERINE/THREONINE-PROTEIN KINASE PKNA                                                            | P9WI83 | 3.4 |
| 2oib | INTERLEUKIN-1 RECEPTOR-ASSOCIATED KINASE 4                                                      | Q9NWZ3 | 3.4 |
| 4js8 | DUAL SPECIFICITY PROTEIN KINASE TTK                                                             | P33981 | 3.4 |
| 4wih | CAMP-DEPENDENT PROTEIN KINASE CATALYTIC SUBUNIT ALPHA                                           | P25321 | 3.4 |
| 2a19 | INTERFERON-INDUCED, DOUBLE-STRANDED RNA-ACTIVATED PROTEIN KINASE                                | P19525 | 3.4 |
| 2zmd | DUAL SPECIFICITY PROTEIN KINASE TTK                                                             | P33981 | 3.4 |
| 2yex | SERINE/THREONINE-PROTEIN KINASE CHK1                                                            | O14757 | 3.4 |
| 4yc6 | CYCLIN-DEPENDENT KINASE 1                                                                       | P06493 | 3.3 |
| 4idt | MITOGEN-ACTIVATED PROTEIN KINASE KINASE KINASE 14                                               | Q99558 | 3.3 |
| 1koa | TWITCHIN                                                                                        | Q23551 | 3.3 |
| 4rgj | CALCIUM-DEPENDENT PROTEIN KINASE 4                                                              | Q8IBS5 | 3.3 |
| 4bfm | MATERNAL EMBRYONIC LEUCINE ZIPPER KINASE                                                        | Q61846 | 3.3 |
| 4ci6 | PROTEIN KINASE YOPO                                                                             | Q93KQ6 | 3.3 |
| 3uc3 | SERINE/THREONINE-PROTEIN KINASE SRK2I                                                           | Q39193 | 3.3 |
| 1ob3 | CELL DIVISION CONTROL PROTEIN 2 HOMOLOG                                                         | Q07785 | 3.3 |
| 4c2v | AURORA KINASE B-A                                                                               | Q6DE08 | 3.3 |
| 2wqm | SERINE/THREONINE-PROTEIN KINASE NEK7                                                            | Q8TDX7 | 3.3 |
| 3a99 | PROTO-ONCOGENE SERINE/THREONINE-PROTEIN KINASE PIM-1                                            | P11309 | 3.3 |
| 2fst | MITOGEN-ACTIVATED PROTEIN KINASE 14                                                             | Q16539 | 3.3 |
| 3hmp | DUAL SPECIFICITY PROTEIN KINASE TTK                                                             | P33981 | 3.3 |
| 4rpv | SERINE/THREONINE-PROTEIN KINASE PIM-1                                                           | P11309 | 3.3 |

|      |                                                                                                 |        |     |
|------|-------------------------------------------------------------------------------------------------|--------|-----|
| 3gp0 | MITOGEN-ACTIVATED PROTEIN KINASE 11                                                             | Q15759 | 3.3 |
| 3oz6 | MITOGEN-ACTIVATED PROTEIN KINASE 1, SERINE/THREONINE PROTEIN KINASE                             | A3FQ79 | 3.3 |
| 2acx | G PROTEIN-COUPLED RECEPTOR KINASE 6                                                             | P43250 | 3.3 |
| 2zv7 | TYROSINE-PROTEIN KINASE LYN                                                                     | P25911 | 3.3 |
| 3lcd | MACROPHAGE COLONY-STIMULATING FACTOR 1 RECEPTOR                                                 | P07333 | 3.3 |
| 4krd | CYCLIN-DEPENDENT PROTEIN KINASE PHO85                                                           | P17157 | 3.3 |
| 4i5p | SERINE/THREONINE-PROTEIN KINASE PLK2                                                            | Q9NYY3 | 3.3 |
| 4fl3 | TYROSINE-PROTEIN KINASE SYK                                                                     | P43405 | 3.3 |
| 3qup | TYROSINE-PROTEIN KINASE RECEPTOR TYRO3                                                          | P55144 | 3.3 |
| 1fmk | TYROSINE-PROTEIN KINASE SRC                                                                     | P12931 | 3.3 |
| 3com | SERINE/THREONINE-PROTEIN KINASE 4                                                               | Q13043 | 3.3 |
| 4ow8 | SERINE/THREONINE-PROTEIN KINASE PKNA                                                            | P9WI82 | 3.3 |
| 3hko | CALCIUM/CALMODULIN-DEPENDENT PROTEIN KINASE WITH A KINASE DOMAIN AND 2 CALMODULIN-LIKE EF HANDS | Q5CZ29 | 3.3 |
| 2f2u | RHO-ASSOCIATED PROTEIN KINASE 2                                                                 | Q28021 | 3.3 |
| 4tpt | LIM DOMAIN KINASE 2                                                                             | P53671 | 3.3 |
| 4bky | MATERNAL EMBRYONIC LEUCINE ZIPPER KINASE                                                        | Q14680 | 3.3 |
| 1xjd | PROTEIN KINASE C, THETA TYPE                                                                    | Q04759 | 3.3 |
| 4rer | 5'-AMP-ACTIVATED PROTEIN KINASE CATALYTIC SUBUNIT ALPHA-1                                       | Q13131 | 3.3 |
| 3v8s | RHO-ASSOCIATED PROTEIN KINASE 1                                                                 | Q13464 | 3.3 |
| 3lm5 | SERINE/THREONINE-PROTEIN KINASE 17B                                                             | O94768 | 3.2 |
| 3mtl | CELL DIVISION PROTEIN KINASE 16                                                                 | Q00536 | 3.2 |
| 4yno | MITOGEN-ACTIVATED PROTEIN KINASE 13                                                             | O15264 | 3.2 |
| 3eb0 | PUTATIVE UNCHARACTERIZED PROTEIN                                                                | A3FQN0 | 3.2 |
| 4f6u | CYCLIN-DEPENDENT KINASE 8                                                                       | P49336 | 3.2 |
| 2pzi | PROBABLE SERINE/THREONINE-PROTEIN KINASE PKNG                                                   | P9WI73 | 3.2 |
| 4d28 | CBL-INTERACTING SERINE/THREONINE-PROTEIN KINASE 24                                              | Q9LD13 | 3.2 |
| 2i0e | PROTEIN KINASE C-BETA II                                                                        | P05771 | 3.2 |
| 1zy4 | SERINE/THREONINE-PROTEIN KINASE GCN2                                                            | P15442 | 3.2 |
| 2v7o | CALCIUM/CALMODULIN-DEPENDENT PROTEIN KINASE TYPE II GAMMA CHAIN                                 | Q13555 | 3.2 |
| 4qmt | SERINE/THREONINE-PROTEIN KINASE 24                                                              | Q9Y6E0 | 3.2 |
| 3hzt | CALCIUM-DEPENDENT PROTEIN KINASE 3                                                              | Q3HNM6 | 3.2 |
| 3zrf | MGC80376 PROTEIN                                                                                | Q6INT1 | 3.2 |
| 1cm8 | PHOSPHORYLATED MAP KINASE P38-GAMMA                                                             | P53778 | 3.2 |
| 4r1v | HEPATOCTE GROWTH FACTOR RECEPTOR                                                                | P08581 | 3.2 |
| 3uim | BRASSINOSTEROID INSENSITIVE 1-ASSOCIATED RECEPTOR KINASE 1                                      | Q94F62 | 3.2 |
| 3dls | PAS DOMAIN-CONTAINING SERINE/THREONINE-PROTEIN KINASE                                           | Q96RG2 | 3.2 |
| 2ac3 | MAP KINASE-INTERACTING SERINE/THREONINE KINASE 2                                                | Q9HBH9 | 3.2 |
| 4obo | MITOGEN-ACTIVATED PROTEIN KINASE KINASE KINASE 4                                                | O95819 | 3.2 |
| 3dak | SERINE/THREONINE-PROTEIN KINASE OSR1                                                            | O95747 | 3.2 |
| 2qlu | ACTIVIN RECEPTOR TYPE IIB                                                                       | Q13705 | 3.2 |

|      |                                                                             |        |     |
|------|-----------------------------------------------------------------------------|--------|-----|
| 3v5w | G-PROTEIN COUPLED RECEPTOR KINASE 2                                         | P25098 | 3.2 |
| 4wsq | AP2-ASSOCIATED PROTEIN KINASE 1                                             | Q2M2I8 | 3.2 |
| 4mvf | CALCIUM-DEPENDENT PROTEIN KINASE 2                                          | O15865 | 3.2 |
| 3cek | DUAL SPECIFICITY PROTEIN KINASE TTK                                         | P33981 | 3.2 |
| 2y7j | PHOSPHORYLASE B KINASE GAMMA CATALYTIC CHAIN, TESTIS/LIVER ISOFORM          | P15735 | 3.2 |
| 3kul | EPHRIN TYPE-A RECEPTOR 8                                                    | P29322 | 3.2 |
| 4p2k | EPHRIN TYPE-A RECEPTOR 2                                                    | P29317 | 3.2 |
| 3zfy | EPHRIN TYPE-B RECEPTOR 3                                                    | P54753 | 3.2 |
| 1q8y | SR PROTEIN KINASE                                                           | Q03656 | 3.2 |
| 2y4i | KINASE SUPPRESSOR OF RAS 2                                                  | Q6VAB6 | 3.2 |
| 1luf | MUSCLE-SPECIFIC TYROSINE KINASE RECEPTOR MUSK                               | Q62838 | 3.2 |
| 4b6l | SERINE/THREONINE-PROTEIN KINASE PLK3                                        | Q9H4B4 | 3.2 |
| 3p1a | MEMBRANE-ASSOCIATED TYROSINE- AND THREONINE-SPECIFIC CDC2-INHIBITORY KINASE | Q99640 | 3.2 |
| 3bkb | PROTO-ONCOGENE TYROSINE-PROTEIN KINASE FES/FPS                              | P07332 | 3.2 |
| 2j0i | SERINE/THREONINE-PROTEIN KINASE PAK 4                                       | O96013 | 3.2 |
| 3gbz | KINASE, CMGC CDK                                                            | A8BZ95 | 3.2 |
| 3wf7 | RIBOSOMAL PROTEIN S6 KINASE BETA-1                                          | P23443 | 3.2 |
| 2wei | CALMODULIN-DOMAIN PROTEIN KINASE 1, PUTATIVE                                | A3FQ16 | 3.2 |
| 3niz | RHODANESE FAMILY PROTEIN                                                    | Q5CRJ8 | 3.2 |
| 4oh4 | PROTEIN BRASSINOSTEROID INSENSITIVE 1                                       | O22476 | 3.2 |
| 2ycf | SERINE/THREONINE-PROTEIN KINASE CHK2                                        | O96017 | 3.1 |
| 2eu9 | DUAL SPECIFICITY PROTEIN KINASE CLK3                                        | P49761 | 3.1 |
| 4btf | MIXED LINEAGE KINASE DOMAIN-LIKE PROTEIN                                    | Q9D2Y4 | 3.1 |
| 3bhy | DEATH-ASSOCIATED PROTEIN KINASE 3                                           | O43293 | 3.1 |
| 3n9x | PHOSPHOTRANSFERASE                                                          | Q4Z5A3 | 3.1 |
| 3fpq | SERINE/THREONINE-PROTEIN KINASE WNK1                                        | Q9JIH7 | 3.1 |
| 3ma6 | CALMODULIN-DOMAIN PROTEIN KINASE 1                                          | Q9BJF5 | 3.1 |
| 3hyh | CARBON CATABOLITE-DEREPRESSING PROTEIN KINASE                               | P06782 | 3.1 |
| 4agu | CYCLIN-DEPENDENT KINASE-LIKE 1                                              | Q00532 | 3.1 |
| 2hak | SERINE/THREONINE-PROTEIN KINASE MARK1                                       | Q9P0L2 | 3.1 |
| 3txo | PROTEIN KINASE C ETA TYPE                                                   | P24723 | 3.1 |
| 4euu | SERINE/THREONINE-PROTEIN KINASE TBK1                                        | Q9UHD2 | 3.1 |
| 4o38 | CYCLIN-G-ASSOCIATED KINASE                                                  | O14976 | 3.1 |
| 4m68 | MIXED LINEAGE KINASE DOMAIN-LIKE PROTEIN                                    | Q9D2Y4 | 3.1 |
| 3poz | EPIDERMAL GROWTH FACTOR RECEPTOR                                            | P00533 | 3.1 |
| 4qny | MITOGEN ACTIVATED PROTEIN KINASE, PUTATIVE                                  | E9BQ78 | 3.1 |
| 3nr9 | DUAL SPECIFICITY PROTEIN KINASE CLK2                                        | P49760 | 3.1 |
| 1u59 | TYROSINE-PROTEIN KINASE ZAP-70                                              | P43403 | 3.1 |
| 4oth | SERINE/THREONINE-PROTEIN KINASE N1                                          | Q16512 | 3.1 |
| 2r4b | RECEPTOR TYROSINE-PROTEIN KINASE ERBB-4                                     | Q15303 | 3.1 |
| 2dyl | DUAL SPECIFICITY MITOGEN-ACTIVATED PROTEIN KINASE KINASE 7                  | O14733 | 3.1 |

|      |                                                                      |        |     |
|------|----------------------------------------------------------------------|--------|-----|
| 2h34 | SERINE/THREONINE-PROTEIN KINASE PKNE                                 | P9WI77 | 3.1 |
| 3c1x | HEPATOCTE GROWTH FACTOR RECEPTOR                                     | P08581 | 3.1 |
| 2xrw | MITOGEN-ACTIVATED PROTEIN KINASE 8                                   | P45983 | 3.1 |
| 2x7f | TRAF2 AND NCK-INTERACTING PROTEIN KINASE                             | Q9UKE5 | 3.1 |
| 4hzs | ACTIVATED CDC42 KINASE 1                                             | Q07912 | 3.1 |
| 4ckj | PROTO-ONCOGENE TYROSINE-PROTEIN KINASE RECEPTOR RET                  | P07949 | 3.1 |
| 4o2z | MITOGEN-ACTIVATED PROTEIN KINASE 3, PUTATIVE                         | E9BA99 | 3.1 |
| 2w5a | SERINE/THREONINE-PROTEIN KINASE NEK2                                 | P51955 | 3.1 |
| 4fie | SERINE/THREONINE-PROTEIN KINASE PAK 4                                | O96013 | 3.1 |
| 4fkl | CYCLIN-DEPENDENT KINASE 2                                            | P24941 | 3.1 |
| 4fr4 | SERINE/THREONINE-PROTEIN KINASE 32A                                  | Q8WU08 | 3.1 |
| 3cc6 | PROTEIN TYROSINE KINASE 2 BETA                                       | Q14289 | 3.1 |
| 4lgd | SERINE/THREONINE-PROTEIN KINASE 3                                    | Q13188 | 3.1 |
| 4m3a | STRESS-ACTIVATED PROTEIN KINASE JNK                                  | P92208 | 3.1 |
| 4qfr | 5'-AMP-ACTIVATED PROTEIN KINASE CATALYTIC SUBUNIT ALPHA-1            | P54645 | 3.1 |
| 4x7q | SERINE/THREONINE-PROTEIN KINASE PIM-2                                | Q9P1W9 | 3.1 |
| 2wel | CALCIUM/CALMODULIN-DEPENDENT PROTEIN KINASE TYPE II DELTA CHAIN      | Q13557 | 3.1 |
| 3e7o | MITOGEN-ACTIVATED PROTEIN KINASE 9                                   | P45984 | 3.1 |
| 4b9d | SERINE/THREONINE-PROTEIN KINASE NEK1                                 | Q96PY6 | 3.0 |
| 2r5t | SERINE/THREONINE-PROTEIN KINASE SGK1                                 | O00141 | 3.0 |
| 3udb | SERINE/THREONINE-PROTEIN KINASE SRK2E                                | Q940H6 | 3.0 |
| 1z57 | DUAL SPECIFICITY PROTEIN KINASE CLK1                                 | P49759 | 3.0 |
| 3dj6 | SERINE/THREONINE KINASE 6                                            | P97477 | 3.0 |
| 1j1b | GLYCOGEN SYNTHASE KINASE-3 BETA                                      | P49841 | 3.0 |
| 3nyv | CALMODULIN-DOMAIN PROTEIN KINASE 1                                   | Q9BJF5 | 3.0 |
| 4gv1 | RAC-ALPHA SERINE/THREONINE-PROTEIN KINASE                            | P31749 | 3.0 |
| 4j7b | POLO-LIKE KINASE                                                     | Q6DRK7 | 3.0 |
| 3eyg | TYROSINE-PROTEIN KINASE                                              | P23458 | 3.0 |
| 3nie | MAP2 KINASE                                                          | Q7KQK7 | 3.0 |
| 4wov | NON-RECEPTOR TYROSINE-PROTEIN KINASE TYK2                            | P29597 | 3.0 |
| 2vz6 | CALCIUM CALMODULIN DEPENDENT PROTEIN KINASE TYPE II ALPHA CHAIN      | Q9UQM7 | 3.0 |
| 4bf2 | MITOGEN-ACTIVATED PROTEIN KINASE KINASE KINASE 5                     | Q99683 | 3.0 |
| 4cfe | 5'-AMP-ACTIVATED PROTEIN KINASE CATALYTIC SUBUNIT ALPHA-2            | P54646 | 3.0 |
| 3kk8 | CALCIUM/CALMODULIN DEPENDENT PROTEIN KINASE II                       | O62305 | 3.0 |
| 2yab | DEATH-ASSOCIATED PROTEIN KINASE 2                                    | Q8VDF3 | 3.0 |
| 3pg1 | MITOGEN-ACTIVATED PROTEIN KINASE, PUTATIVE (MAP KINASE-LIKE PROTEIN) | Q4QHJ8 | 3.0 |
| 4ra4 | PROTEIN KINASE C                                                     | P17252 | 3.0 |
| 2ozo | TYROSINE-PROTEIN KINASE ZAP-70                                       | P43403 | 3.0 |
| 1ua2 | CELL DIVISION PROTEIN KINASE 7                                       | P50613 | 3.0 |
| 3bh  | CALCIUM/CALMODULIN-DEPENDENT PROTEIN KINASE TYPE II BETA             | Q13554 | 3.0 |



|      |                                                              |        |     |
|------|--------------------------------------------------------------|--------|-----|
| 4hzt | ACTIVATED CDC42 KINASE 1                                     | Q07912 | 3.0 |
| 3qd2 | EUKARYOTIC TRANSLATION INITIATION FACTOR 2-ALPHA KINASE 3    | Q9Z2B5 | 3.0 |
| 4g3f | NF-KAPPA-BETA-INDUCING KINASE                                | Q9WUL6 | 3.0 |
| 4mwi | MIXED LINEAGE KINASE DOMAIN-LIKE PROTEIN                     | Q8NB16 | 3.0 |
| 3eqc | DUAL SPECIFICITY MITOGEN-ACTIVATED PROTEIN KINASE KINASE 1   | Q02750 | 3.0 |
| 2w96 | CELL DIVISION PROTEIN KINASE 4                               | P11802 | 3.0 |
| 2a2a | DEATH-ASSOCIATED PROTEIN KINASE 2                            | Q9UIK4 | 3.0 |
| 4oac | PROTEIN BRASSINOSTEROID INSENSITIVE 1                        | O22476 | 3.0 |
| 4myj | CGMP-DEPENDENT PROTEIN KINASE                                | Q8MMZ4 | 3.0 |
| 4an3 | DUAL SPECIFICITY MITOGEN-ACTIVATED PROTEIN KINASE KINASE 1   | Q02750 | 3.0 |
| 1zws | DAP-KINASE RELATED PROTEIN 1                                 | Q9UIK4 | 3.0 |
| 3e3p | PROTEIN KINASE, PUTATIVE GLYCOGEN SYNTHASE KINASE            | Q4QE15 | 3.0 |
| 4au8 | CYCLIN-DEPENDENT KINASE 5                                    | Q00535 | 3.0 |
| 4ks7 | SERINE/THREONINE-PROTEIN KINASE PAK 6                        | Q9NQU5 | 3.0 |
| 1s9i | DUAL SPECIFICITY MITOGEN-ACTIVATED PROTEIN KINASE KINASE 2   | P36507 | 2.9 |
| 4otw | RECEPTOR TYROSINE-PROTEIN KINASE ERBB-3                      | P21860 | 2.9 |
| 2jam | CALCIUM/CALMODULIN-DEPENDENT PROTEIN KINASE TYPE 1G          | Q96NX5 | 2.9 |
| 3uc4 | SERINE/THREONINE-PROTEIN KINASE SRK2E                        | Q940H6 | 2.9 |
| 2b9h | MITOGEN-ACTIVATED PROTEIN KINASE FUS3                        | P16892 | 2.9 |
| 2j7t | SERINE/THREONINE-PROTEIN KINASE 10                           | O94804 | 2.9 |
| 4uak | SERINE/THREONINE-PROTEIN KINASE MRCK BETA                    | Q9Y5S2 | 2.9 |
| 2pmn | SER/THR PROTEIN KINASE, PUTATIVE                             | Q7YTF7 | 2.9 |
| 4u6r | SERINE/THREONINE-PROTEIN KINASE/ENDORIBONUCLEASE IRE1        | O75460 | 2.9 |
| 2buj | SERINE/THREONINE-PROTEIN KINASE 16                           | O75716 | 2.9 |
| 4rz7 | CGMP-DEPENDENT PROTEIN KINASE, PUTATIVE                      | A5K0N4 | 2.9 |
| 3c0i | PERIPHERAL PLASMA MEMBRANE PROTEIN CASK                      | O14936 | 2.9 |
| 3fxz | SERINE/THREONINE-PROTEIN KINASE PAK 1                        | Q13153 | 2.9 |
| 1wak | SERINE/THREONINE-PROTEIN KINASE SPRK1                        | Q96SB4 | 2.9 |
| 4wno | SERINE/THREONINE-PROTEIN KINASE ULK1                         | O75385 | 2.9 |
| 2oza | MAP KINASE-ACTIVATED PROTEIN KINASE 2                        | P49137 | 2.9 |
| 1fvr | TYROSINE-PROTEIN KINASE TIE-2                                | Q02763 | 2.9 |
| 4nif | RIBOSOMAL PROTEIN S6 KINASE ALPHA-1                          | Q15418 | 2.9 |
| 4fvq | TYROSINE-PROTEIN KINASE JAK2                                 | O60674 | 2.9 |
| 2x7g | UNCHARACTERIZED PROTEIN SRPK2                                | P78362 | 2.9 |
| 3h4j | SNF1-LIKE PROTEIN KINASE SSP2                                | O74536 | 2.9 |
| 2qr7 | RIBOSOMAL PROTEIN S6 KINASE ALPHA-3                          | P18654 | 2.9 |
| 2rio | SERINE/THREONINE-PROTEIN KINASE/ENDORIBONUCLEASE IRE1        | P32361 | 2.9 |
| 3mi9 | CELL DIVISION PROTEIN KINASE 9                               | P50750 | 2.8 |
| 4nst | CYCLIN-DEPENDENT KINASE 12                                   | Q9NYV4 | 2.8 |
| 2x4f | MYOSIN LIGHT CHAIN KINASE FAMILY MEMBER 4                    | Q86YV6 | 2.8 |
| 3kvw | DUAL SPECIFICITY TYROSINE-PHOSPHORYLATION-REGULATED KINASE 2 | Q92630 | 2.8 |
| 4whz | MITOGEN-ACTIVATED PROTEIN KINASE 10                          | P53779 | 2.8 |

|      |                                                                                                 |        |     |
|------|-------------------------------------------------------------------------------------------------|--------|-----|
| 4y85 | MITOGEN-ACTIVATED PROTEIN KINASE KINASE KINASE 8                                                | P41279 | 2.8 |
| 4qtb | MITOGEN-ACTIVATED PROTEIN KINASE 3                                                              | P27361 | 2.8 |
| 2c47 | CASEIN KINASE 1 GAMMA 2 ISOFORM                                                                 | P78368 | 2.8 |
| 4bgq | CYCLIN-DEPENDENT KINASE-LIKE 5                                                                  | O76039 | 2.8 |
| 3f3z | CALCIUM/CALMODULIN-DEPENDENT PROTEIN KINASE WITH A KINASE DOMAIN AND 4 CALMODULIN LIKE EF HANDS | Q5CYL9 | 2.8 |
| 3gni | STRAD ALPHA                                                                                     | Q7RTN6 | 2.8 |
| 2rku | SERINE/THREONINE-PROTEIN KINASE PLK1                                                            | P53350 | 2.8 |
| 4jlc | SERINE/THREONINE-PROTEIN KINASE TBK1                                                            | Q9WUN2 | 2.8 |
| 4c0t | LIKELY PROTEIN KINASE                                                                           | Q5A3P6 | 2.8 |
| 3kn6 | RIBOSOMAL PROTEIN S6 KINASE ALPHA-5                                                             | O75582 | 2.8 |
| 2f57 | SERINE/THREONINE-PROTEIN KINASE PAK 7                                                           | Q9P286 | 2.8 |
| 4md7 | CASEIN KINASE II SUBUNIT ALPHA                                                                  | P68400 | 2.8 |
| 3llt | SERINE/THREONINE KINASE-1, PFLAMMER                                                             | Q8IL19 | 2.8 |
| 3war | CASEIN KINASE II SUBUNIT ALPHA                                                                  | P68400 | 2.8 |
| 4e7w | GLYCOGEN SYNTHASE KINASE 3                                                                      | N/A    | 2.8 |
| 4lqs | SERINE/THREONINE-PROTEIN KINASE CBK1                                                            | P53894 | 2.8 |
| 4l68 | LEUCINE-RICH REPEAT PROTEIN KINASE-LIKE PROTEIN                                                 | Q9LSI9 | 2.8 |
| 4twc | CASEIN KINASE I ISOFORM DELTA                                                                   | P48730 | 2.8 |
| 1nxk | MAP KINASE-ACTIVATED PROTEIN KINASE 2                                                           | P49137 | 2.8 |
| 3a8x | PROTEIN KINASE C IOTA TYPE                                                                      | P41743 | 2.8 |
| 4rlk | CASEIN KINASE II SUBUNIT ALPHA                                                                  | P28523 | 2.8 |
| 3fhr | MAP KINASE-ACTIVATED PROTEIN KINASE 3                                                           | Q16644 | 2.8 |
| 1vzo | RIBOSOMAL PROTEIN S6 KINASE ALPHA 5                                                             | O75582 | 2.7 |
| 4af3 | AURORA KINASE B                                                                                 | Q96GD4 | 2.7 |
| 3ubd | RIBOSOMAL PROTEIN S6 KINASE ALPHA-3                                                             | P18654 | 2.7 |
| 3sv0 | CASEIN KINASE I-LIKE                                                                            | Q8LR51 | 2.7 |
| 4qpm | MITOTIC CHECKPOINT SERINE/THREONINE-PROTEIN KINASE BUB1                                         | O43683 | 2.7 |
| 2izr | CASEIN KINASE I ISOFORM GAMMA-3                                                                 | Q9Y6M4 | 2.7 |
| 2v62 | SERINE/THREONINE-PROTEIN KINASE VRK2                                                            | Q86Y07 | 2.7 |
| 3alo | DUAL SPECIFICITY MITOGEN-ACTIVATED PROTEIN KINASE KINASE 4                                      | P45985 | 2.7 |
| 4ic7 | MITOGEN-ACTIVATED PROTEIN KINASE 7                                                              | Q13164 | 2.7 |
| 4im0 | SERINE/THREONINE-PROTEIN KINASE TBK1                                                            | Q9UHD2 | 2.7 |
| 4eut | SERINE/THREONINE-PROTEIN KINASE TBK1                                                            | Q9UHD2 | 2.7 |
| 4yll | DUAL SPECIFICITY TYROSINE-PHOSPHORYLATION-REGULATED KINASE 1A                                   | Q13627 | 2.7 |
| 4zzn | MITOGEN-ACTIVATED PROTEIN KINASE 1                                                              | P28482 | 2.7 |
| 4nfn | TAU-TUBULIN KINASE 1                                                                            | Q5TCY1 | 2.7 |
| 4ix3 | MSSTT7D PROTEIN                                                                                 | C1EBN1 | 2.7 |
| 4iir | SERINE/THREONINE-PROTEIN KINASE PRP4 HOMOLOG                                                    | Q13523 | 2.6 |
| 3ofm | CASEIN KINASE II SUBUNIT ALPHA'                                                                 | P19784 | 2.6 |
| 4btk | TAU-TUBULIN KINASE 1                                                                            | Q5TCY1 | 2.6 |
| 4i93 | PROBABLE SERINE/THREONINE-PROTEIN KINASE AT5G41260                                              | Q9FHD7 | 2.6 |

|      |                                                                                        |        |     |
|------|----------------------------------------------------------------------------------------|--------|-----|
| 3m2w | MAP KINASE-ACTIVATED PROTEIN KINASE 2                                                  | P49137 | 2.6 |
| 3soa | CALCIUM/CALMODULIN-DEPENDENT PROTEIN KINASE TYPE II SUBUNIT ALPHA WITH A BETA 7 LINKER | Q9UQM7 | 2.6 |
| 4pf4 | DEATH-ASSOCIATED PROTEIN KINASE 1                                                      | P53355 | 2.6 |
| 2hw6 | MAP KINASE-INTERACTING SERINE/THREONINE-PROTEIN KINASE 1                               | Q9BUB5 | 2.6 |
| 4f9c | CELL DIVISION CYCLE 7-RELATED PROTEIN KINASE                                           | O00311 | 2.6 |
| 4jr7 | CASEIN KINASE II SUBUNIT ALPHA                                                         | P15790 | 2.6 |
| 3op5 | SERINE/THREONINE-PROTEIN KINASE VRK1                                                   | Q99986 | 2.5 |
| 4jnw | TITIN                                                                                  | Q8WZ42 | 2.5 |
| 3cok | SERINE/THREONINE-PROTEIN KINASE PLK4                                                   | O00444 | 2.5 |
| 3zon | NON-RECEPTOR TYROSINE-PROTEIN KINASE TYK2                                              | P29597 | 2.5 |
| 4o1p | RIBONUCLEASE L                                                                         | A5H025 | 2.5 |
| 2cmw | CASEIN KINASE I ISOFORM GAMMA-1                                                        | Q9HCP0 | 2.5 |
| 1x8b | WEE1-LIKE PROTEIN KINASE                                                               | P30291 | 2.5 |
| 4oav | PROTEIN (RNASE L)                                                                      | Q05823 | 2.4 |
| 4jrn | RHOPTRY KINASE FAMILY PROTEIN                                                          | Q2PAY2 | 2.4 |
| 4nt4 | GILGAMESH, ISOFORM I                                                                   | Q86NK8 | 2.3 |
| 4I00 | TYROSINE-PROTEIN KINASE JAK1                                                           | P23458 | 2.3 |
| 3oht | P38A                                                                                   | A9UJZ9 | 2.3 |
| 1csn | CASEIN KINASE-1                                                                        | P40233 | 2.1 |
| 4cvq | GLUTAMATE-PYRUVATE AMINOTRANSFERASE ALAA                                               | POA959 | 2.0 |

**Table S2:** Calculated docking and binding affinity (MMGBSA) scores of compounds for RIPK1 (PDB 4NEU) active site using different strategies. (A) The Glide SP docked poses. (B) Induced fit docking (IFD) poses. (C) Protein-ligand frames at every 10ns from the 100ns MD simulation. SD stands for standard deviation and N/A for not applicable as no valid pose was obtained.

*A. Glide SP Docked complexes*

| <i>Compound</i> | Glide docking score | Glide gscore | MMGBSA dG Bind (kcal/mol) | MMGBSA dG Bind Coulomb (kcal/mol) |
|-----------------|---------------------|--------------|---------------------------|-----------------------------------|
| <i>Cmpd8</i>    | -14.82              | -15.02       | -97.61                    | -30.13                            |
| <i>GSK414</i>   | -13.33              | -13.34       | -59.60                    | -24.61                            |
| <i>GSK157</i>   | -11.62              | -11.63       | -65.06                    | -18.40                            |
| <i>AMG44</i>    | N/A                 | N/A          | N/A                       | N/A                               |

*B. IFD docked complexes*

| <i>Compound</i> | IFD Docking score | IFD glide gscore | IFD Score | MMGBSA dG Bind (kcal/mol) | MMGBSA dG Bind Coulomb (kcal/mol) |
|-----------------|-------------------|------------------|-----------|---------------------------|-----------------------------------|
| <i>Cmpd8</i>    | -14.65            | -14.85           | -607.51   | -98.20                    | -33.78                            |
| <i>GSK414</i>   | -15.21            | -15.21           | -604.49   | -97.72                    | -33.33                            |
| <i>GSK157</i>   | -14.86            | -14.87           | -605.99   | -92.67                    | -21.11                            |
| <i>AMG44</i>    | -15.51            | -15.52           | -602.96   | -94.73                    | -5.86                             |

*C. IFD MD simulation trajectories*

| <i>Compound</i> | MMGBSA dG Bind Average (kcal/mol) | SD   | MMGBSA dG Range  | MMGBSA dG Bind Coulomb (kcal/mol) | SD   |
|-----------------|-----------------------------------|------|------------------|-----------------------------------|------|
| <i>Cmpd8</i>    | -87.77                            | 4.24 | -95.40 to -80.62 | -28.06                            | 1.99 |
| <i>GSK414</i>   | -87.05                            | 3.60 | -93.25 to -81.18 | -29.74                            | 1.92 |
| <i>GSK157</i>   | -78.76                            | 3.32 | -87.31 to -74.79 | -19.30                            | 1.88 |
| <i>AMG44</i>    | -81.85                            | 8.22 | -95.49 to -70.53 | -10.91                            | 3.02 |

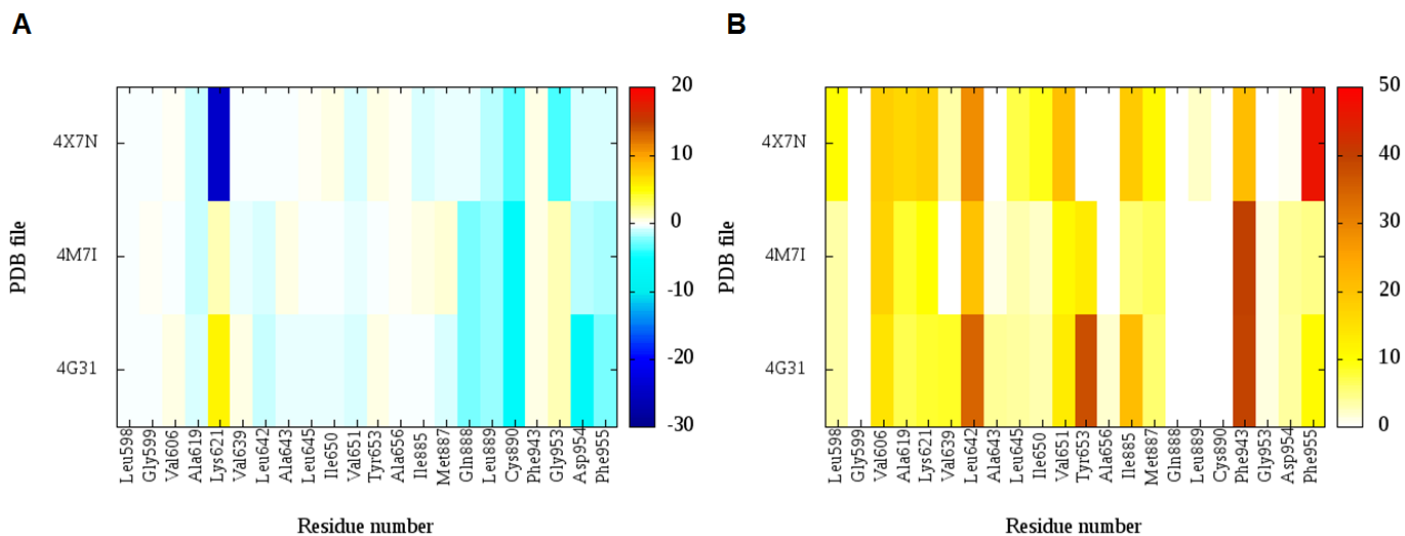

**Figure S1.** Per amino-acid interaction energy map for PERK co-crystal structures: crystal structure of GSK6414 (PDB code: 4G31), GSK6157 (PDB code: 4M7I) and AMG44 (PDB code: 4X7N). (A) Electrostatic energy values (kcal/mol). (B) Hydrophobic score (arbitrary units).

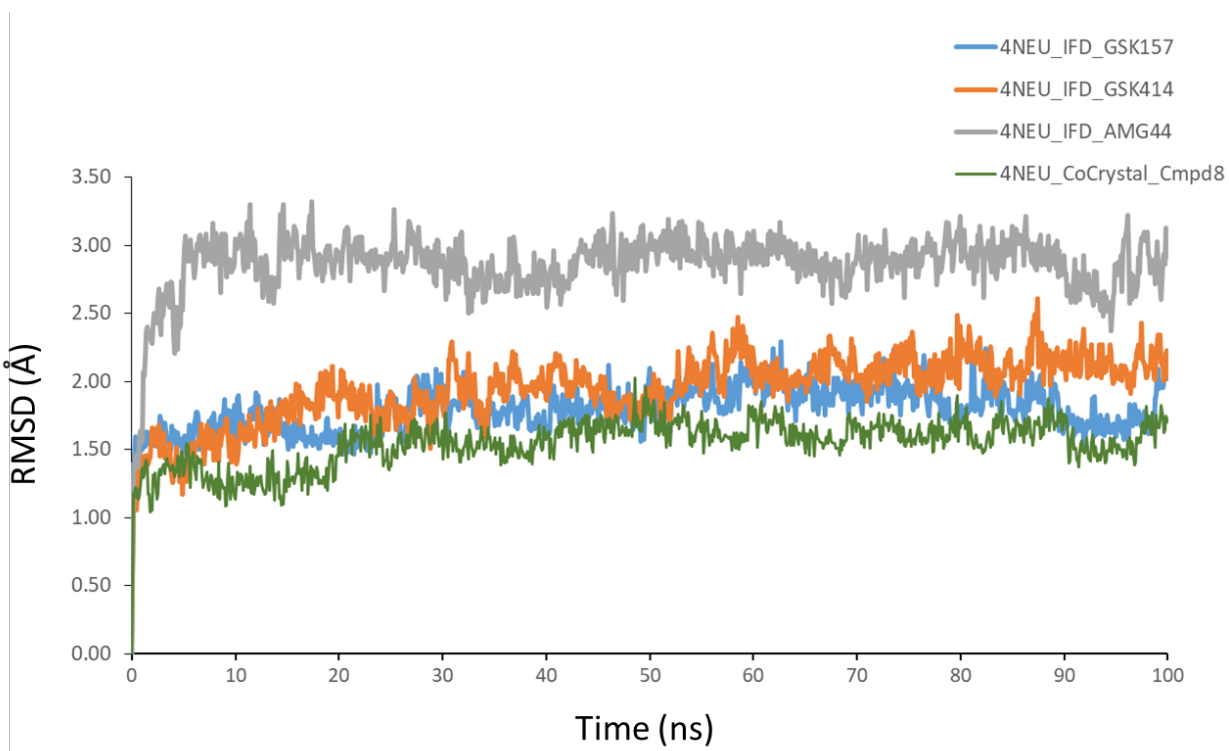

**Figure S2.** Active site dynamics of the RIPK1 complexes during 100ns MD simulations. RMSD of the active site residues is plotted as a function of MD simulation time.

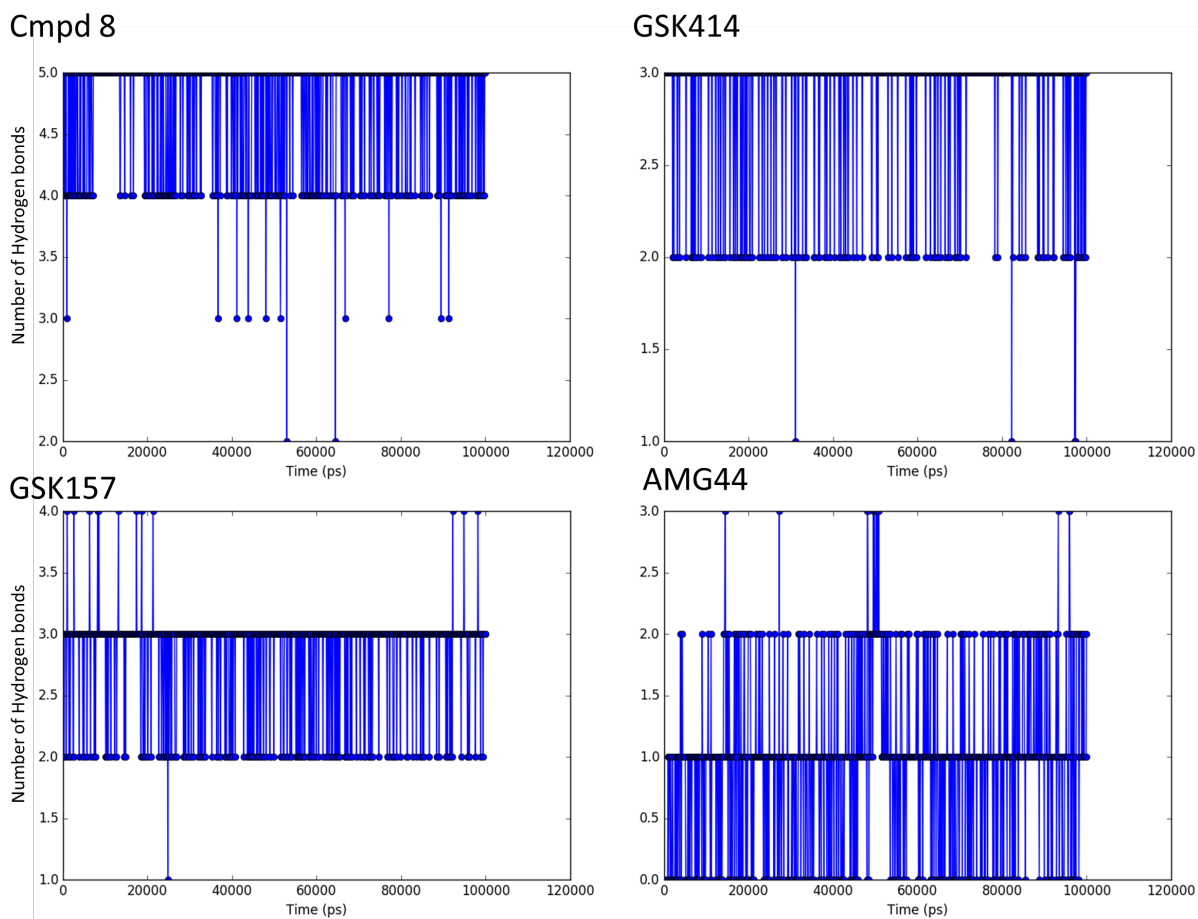

**Figure S3.** Comparison of the number of hydrogen bonds (H-bonds) formed by the compounds at the RIPK1 active site during the 100 ns MD simulation.

## References

- [1] J. Konc, T. Cesnik, J. T. Konc, M. Penca, D. Janezic, *J Chem Inf Model* **2012**, *52*, 604-612.
